# Supplementary material
Source: publisher figshare collection journal article supplement (https://f1000.figshare.com/ndownloader/files/232665)
Supplement: Supplementary file 1 [file 232665]

F2 plants 53 and 54 are from Colx194E9 F1 #5
Sample	C(t)T14G11ext	Copy # T14G11ext	Average Copy # T14G11ext	Std Error T14G11ext	C(t)T14G11int	Copy # T14G11int	Average Copy # T14G11int	Std Error T14G11int	%int of average ext	average %int of average ext	std error %int of average ext	#Int/1000ext	Average #int/1000ext	SE #int/1000ext
53-4	22.65	1835093	1815616	36405	32.39	2157	1683	219	0.1188	0.0927	0.0120	1.1880	0.9270	0.1203
	22.75	1735048			32.91	1596			0.0879			0.8792
	22.61	1876708			33.27	1296			0.0714			0.7138
53-5	23.16	1378766	727472	282075	35.83	294	118	76	0.0405	0.0162	0.0105	0.4047	0.1625	0.1049
	25.31	413085			39.74	31			0.0042			0.0421
	25.41	390565			39.8	30			0.0041			0.0407
53-6	22.12	2469987	2292515	89719	34.53	625	786	124	0.0273	0.0343	0.0054	0.2726	0.3428	0.0539
	22.25	2296382			33.6	1071			0.0467			0.4670
	22.4	2111176			34.43	662			0.0289			0.2888
53-7	22.18	2388288	2322882	32552	32.63	1877	1561	142	0.0808	0.0672	0.0061	0.8081	0.6722	0.0612
	22.28	2258085			33.23	1326			0.0571			0.5710
	22.23	2322274			33.04	1481			0.0637			0.6374
53-8	22.69	1794400	1784500	13186	32.93	1578	1569	156	0.0884	0.0879	0.0088	0.8842	0.8792	0.0876
	22.68	1804488			32.63	1877			0.1052			1.0520
	22.73	1754611			33.33	1252			0.0701			0.7015
53-9	21.88	2825702	2685786	164808	32.55	1966	1830	64	0.0732	0.0681	0.0024	0.7321	0.6814	0.0239
	21.82	2922364			32.79	1711			0.0637			0.6371
	22.24	2309292			32.69	1813			0.0675			0.6751
53-10	22.29	2245461	2185456	57519	32.45	2083	1832	109	0.0953	0.0838	0.0050	0.9533	0.8383	0.0499
	22.28	2258085			32.78	1721			0.0788			0.7875
	22.45	2052821			32.81	1691			0.0774			0.7740
53-11	24.71	578255	1295976	311482	34.94	493	559	60	0.0380	0.0432	0.0046	0.3803	0.4315	0.0462
	22.88	1613099			34.96	487			0.0376			0.3759
	22.79	1696574			34.34	698			0.0538			0.5383
53-12	23.11	1417960	1439640	18775	34.3	714	578	84	0.0496	0.0401	0.0058	0.4959	0.4014	0.0581
	23.11	1417960			35.34	391			0.0272			0.2716
	23.03	1483000			34.52	629			0.0437			0.4366
53-13	27.34	132375	583845	195611	N/A	0	10	9	0.0000	0.0018	0.0015	0.0000	0.0178	0.0154
	24.14	795966			N/A	0			0.0000			0.0000
	24.08	823194			39.71	31			0.0053			0.0534
54-4	23.06	1458267	1592122	85356	34.44	658	687	26	0.0414	0.0431	0.0017	0.4135	0.4314	0.0166
	22.97	1533730			34.45	655			0.0411			0.4111
	22.7	1784369			34.22	748			0.0470			0.4697
54-5	23.13	1402150	1573622	131618	37.34	123	414	139	0.0078	0.0263	0.0088	0.0781	0.2631	0.0885
	23.08	1442009			34.39	678			0.0431			0.4307
	22.61	1876708			35.13	442			0.0281			0.2806
54-6	23.19	1355772	1946176	286009	36.97	152	485	155	0.0078	0.0249	0.0080	0.0782	0.2492	0.0796
	22.51	1984921			34.18	765			0.0393			0.3932
	22.1	2497836			34.79	538			0.0276			0.2762
54-7	22.65	1835093	1602904	126532	37.68	101	97	3	0.0063	0.0061	0.0002	0.0629	0.0607	0.0021
	22.85	1640457			37.89	89			0.0056			0.0557
	23.22	1333161			37.67	101			0.0063			0.0633
54-8	24.72	575022	614845	31722	N/A	0	142	104	0.0000	0.0231	0.0170	0.0000	0.2315	0.1698
	24.7	581505			35.38	382			0.0621			0.6214
	24.4	688008			39.08	45			0.0073			0.0730
54-9	23.47	1158821	1332050	94534	34.16	774	691	84	0.0581	0.0519	0.0063	0.5812	0.5191	0.0629
	23.26	1303599			34.1	802			0.0602			0.6017
	22.97	1533730			34.92	499			0.0374			0.3743
54-10	23.78	973962	1493444	273508	35.83	294	232	81	0.0197	0.0155	0.0054	0.1972	0.1555	0.0544
	23.08	1442009			38.97	48			0.0032			0.0320
	22.44	2064361			35.51	354			0.0237			0.2373
